# Supplementary material
Source: PubMed Central journal article supplement (PMC4004204)

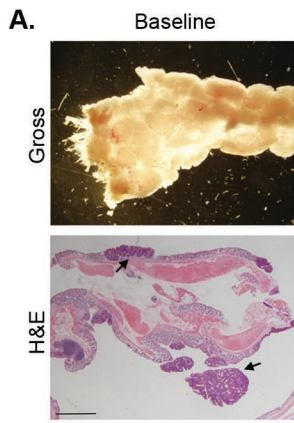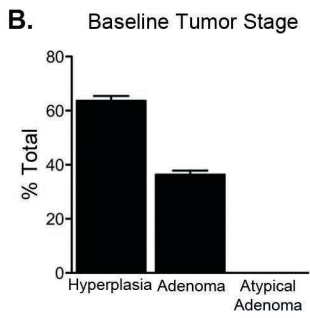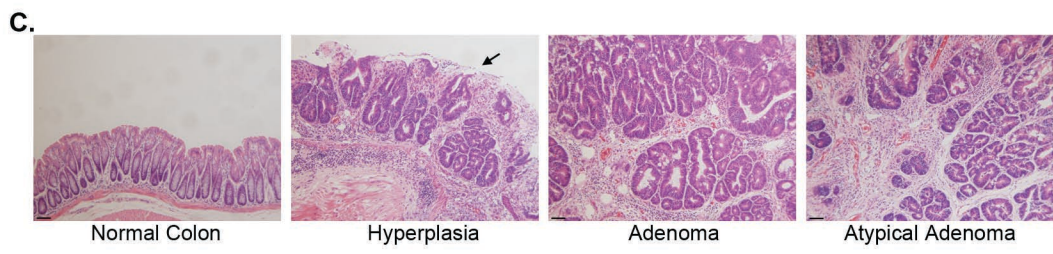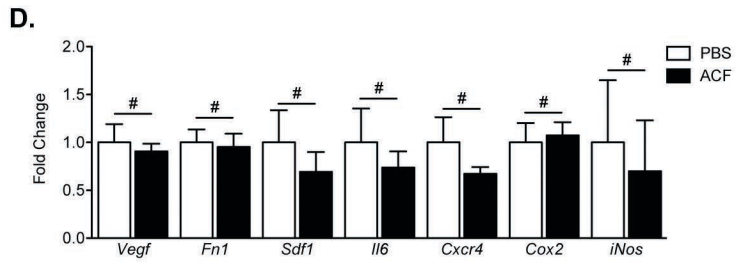

Supplement: supp_bgu004_Supplemental_Figure_1_Carcinogenesis.pdf [file supp_bgu004_Supplemental_Figure_1_Carcinogenesis.pdf]

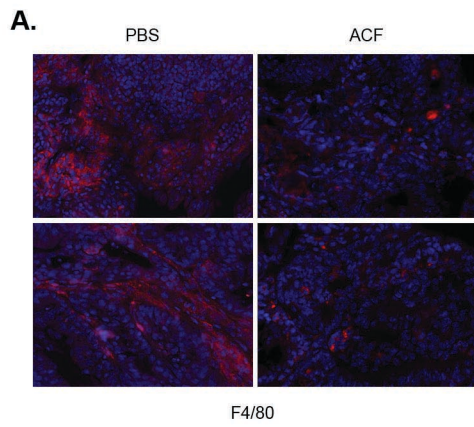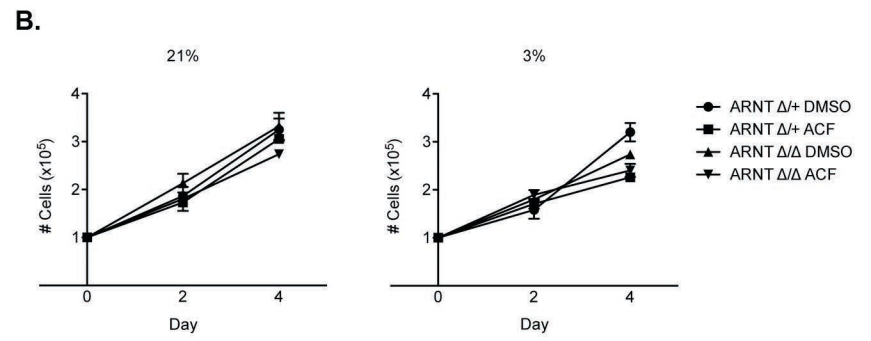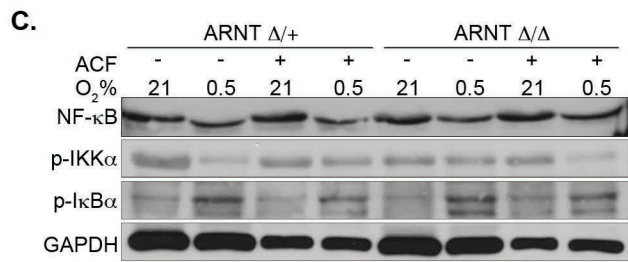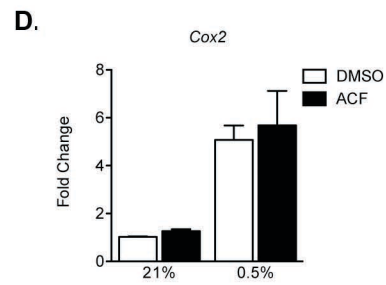

Supplement: supp_bgu004_Supplemental_Figure_3_Carcinogenesis.pdf [file supp_bgu004_Supplemental_Figure_3_Carcinogenesis.pdf]

**A.**

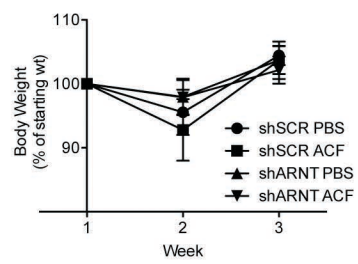

**B.**

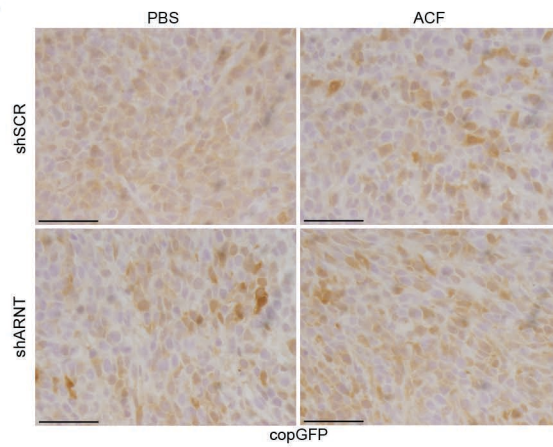

Supplement: supp_bgu004_Supplemental_Figure_5_Carcinogenesis.pdf [file supp_bgu004_Supplemental_Figure_5_Carcinogenesis.pdf]
